# Supplementary material
Source: PubMed Central journal article supplement (PMC5842130)
Supplement: NIHMS937925-supplement.pdf [file NIHMS937925-supplement.pdf]

**FIGURE SUPPLEMENTS**

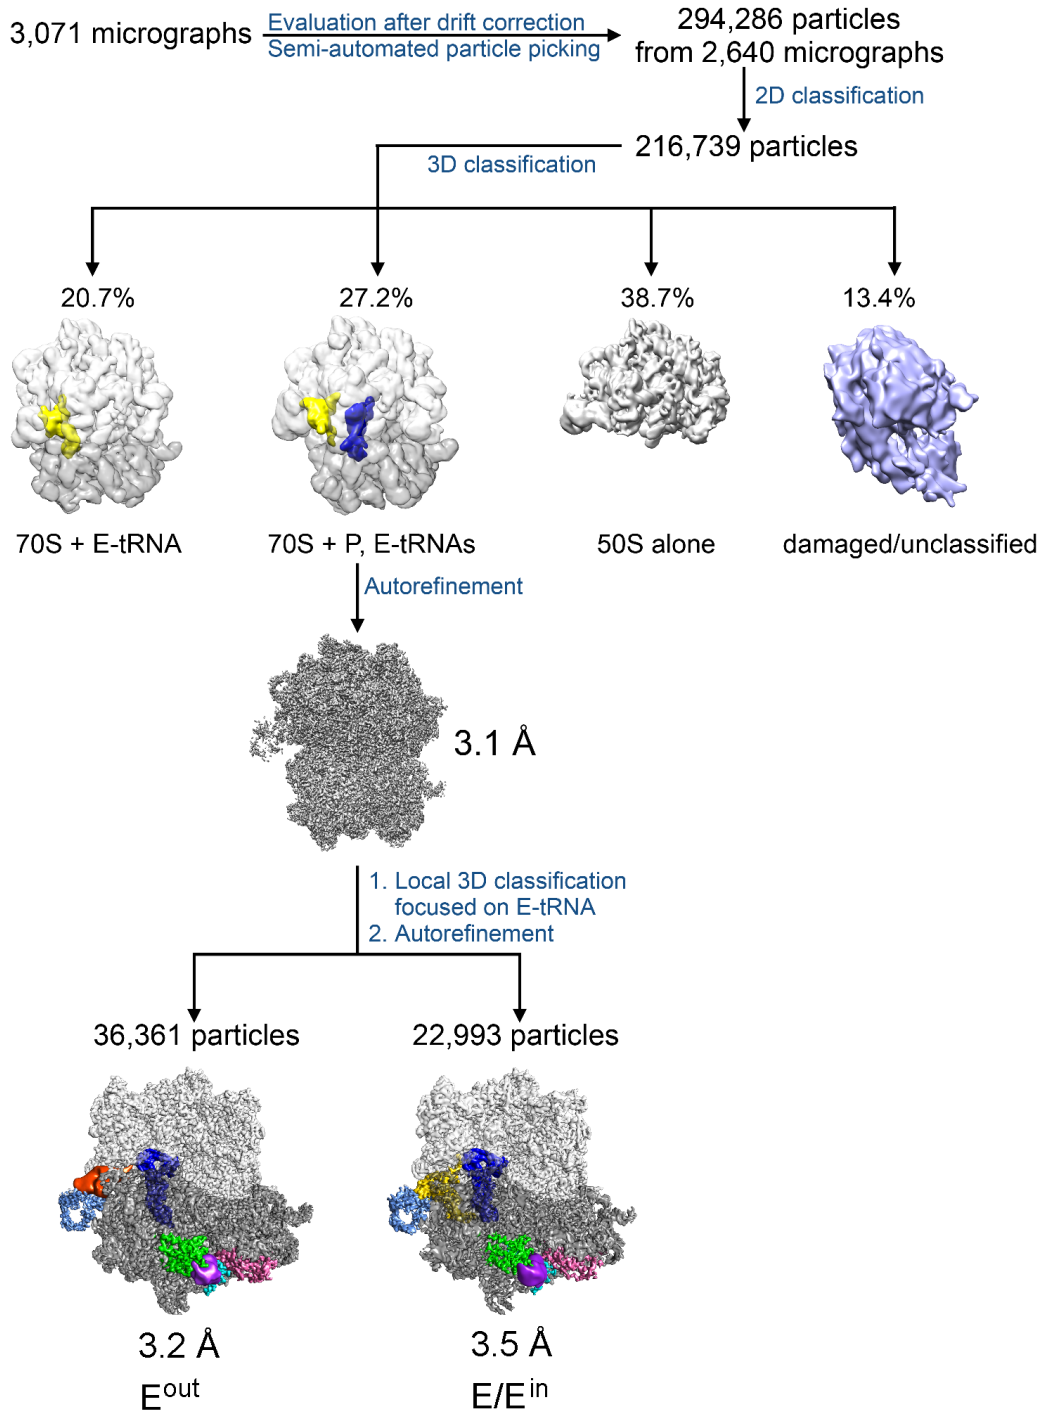

**Figure S1- Related to Figure 1. Particle projection selection, classification, and 3D map**

**reconstruction.** Flow chart of cryoEM data processing of ribosome complexes. Details are provided in the Methods section.

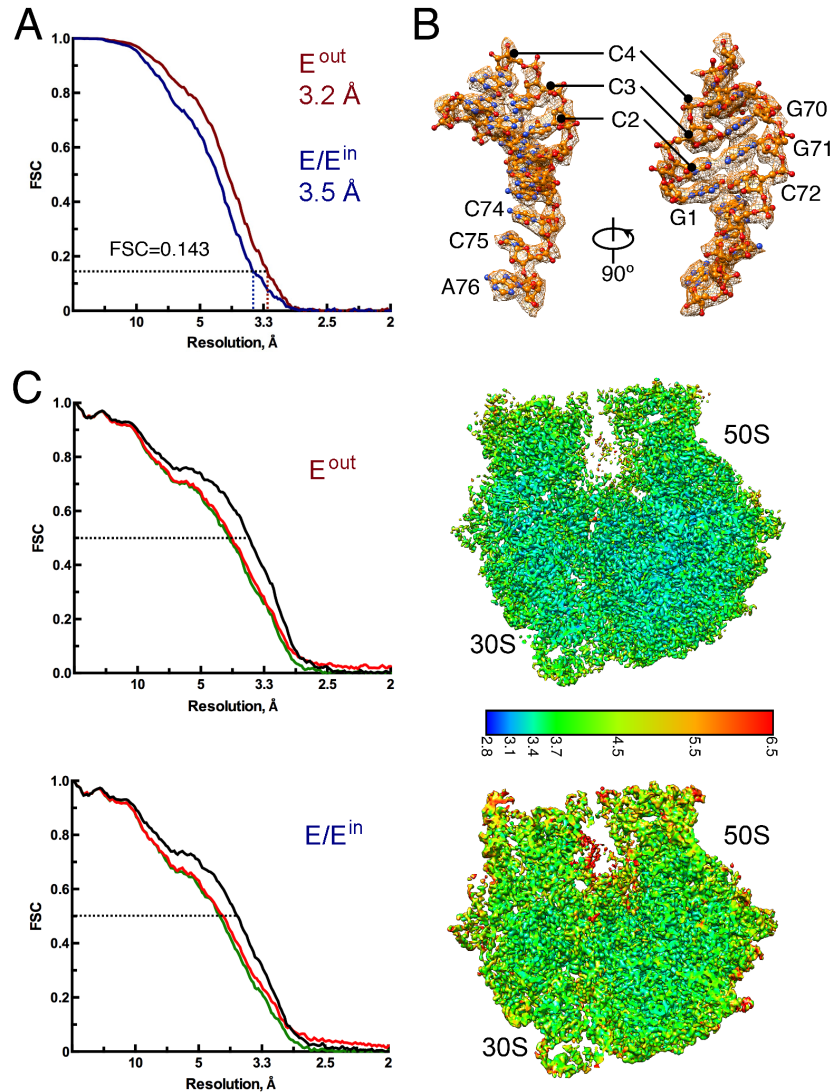

**Figure S2- Related to Figure 1. Quality of maps and models. (A)** Fourier shell correlation (FSC) curves for the EM maps of  $E^{out}$  and  $E^{in}$ . **(B)** Snapshots of map vs. model for the section of acceptor stem of E-site tRNA in the conformation of  $E^{out}$ . The EM density corresponding to acceptor stem of E-site tRNA in  $E^{out}$  is well defined, indicating the high occupancy of E-tRNA. **(C)** Cross-validation between maps and models. FSC curves of the final refined model versus the final cryoEM map (full dataset, black), of the outcome of model refinement with a half map versus the same map (red), and of the outcome of model refinement with a half map versus the other half map (green). The excellent agreement between red and green curves indicates lack of overfitting.

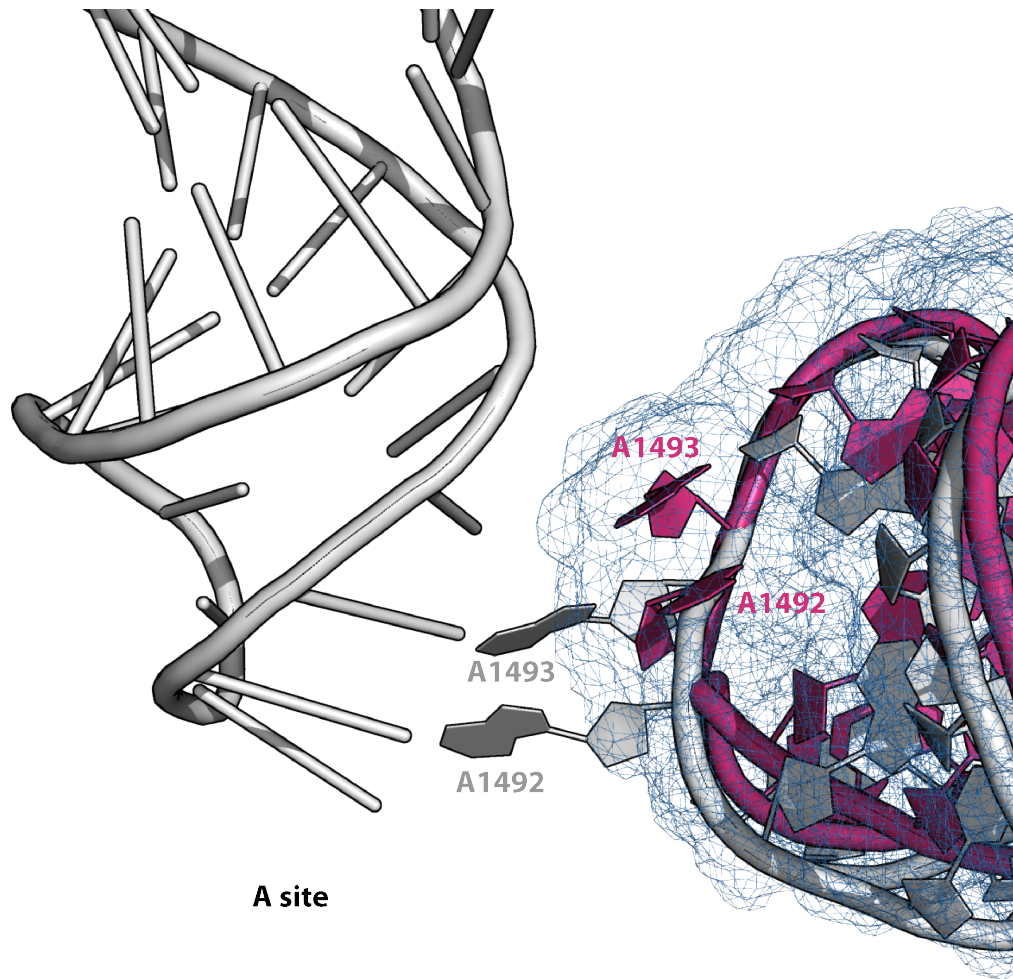

**Figure S3- Related to Figure 1. Decoding center interactions.** Upon A-site tRNA binding, 16S rRNA nucleotides A1492 and A1493 flip from h44 to interact with the mRNA-tRNA pair (shown in gray; PDB code 4Y4P). In the 70S-complex structure, the map indicates that A1492 remains inside h44 and A1493 is half removed from h44 (shown in magenta) indicative of a structure lacking A-site tRNA.

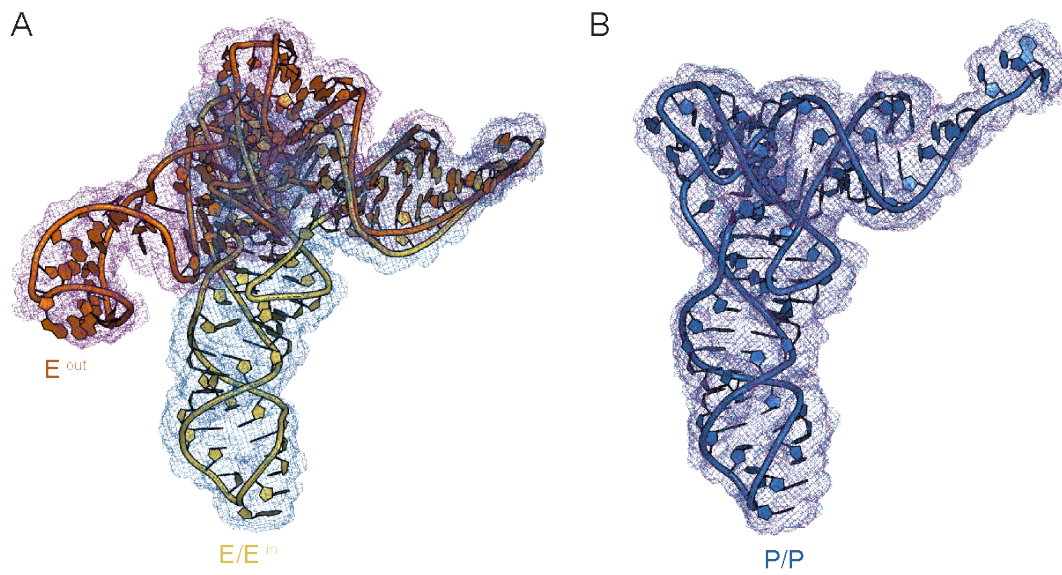

**Figure S4- Related to Figure 1. Map quality for P-site and E-site tRNAs.** EM maps corresponding to a 2.0 Å radius around  $E^{in}$  (light blue) and  $E^{out}$  (light purple) coordinates of the E-site tRNA (panel A) and P-site tRNA (panel B) are shown.

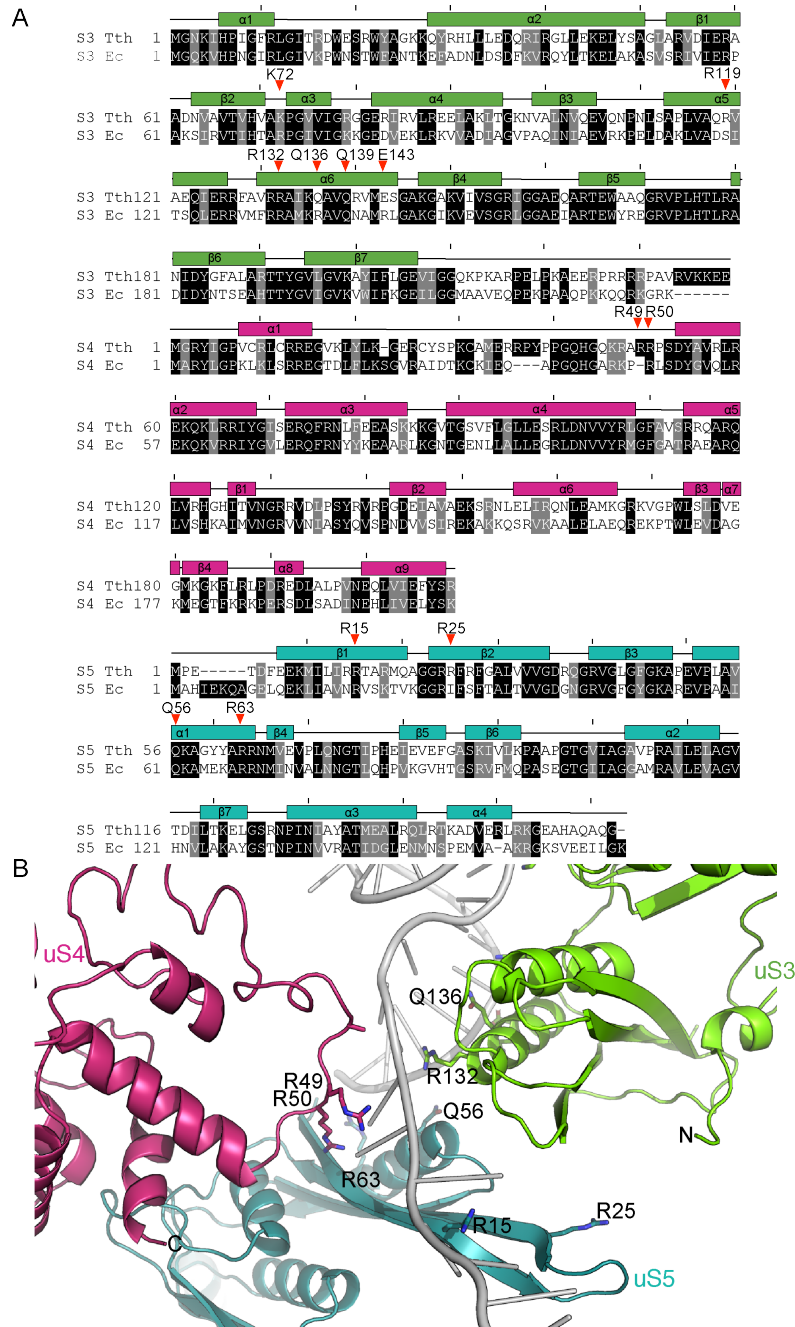

**Figure S5- Related to Figure 2. uS3, uS4, and uS5 sequences and interactions with the mRNA. (A)** Sequence alignments of *Thermus thermophilus* (*Tth*) and *E. coli* (*Ec*) uS3, uS4 and uS5 proteins. Residues implicated in interactions with mRNA as seen in our structure are shown with red triangles. **(B)** uS3, uS4, and uS5 interactions with the mRNA entrance channel looking towards the solvent-exposed stem-loop in the background.
